# Supplementary material for: High-throughput metabolomics enables biomarker discovery in prostate cancer
Source: Royal Society of Chemistry journal article supplement (doi:10.1039/c6ra25007f), 2017-01-01
Supplement: c6ra25007f1.pdf [file c6ra25007f1.pdf]

**Table S1.** Clinical Characteristics of Patients

| Parameter              | Healthy Controls (n = 233) | PCa Patients (n = 236) | P value |
|------------------------|----------------------------|------------------------|---------|
| Age, years             | 69.3±5.2                   | 68.2±5.8               | 0.32    |
| BMI, kg/m <sup>2</sup> | 23.11±1.27                 | 23.32±1.52             | 0.69    |
| DBP, mmHg              | 75.13±8.16                 | 76.44±8.21             | 0.49    |
| SBP, mmHg              | 147.10±22.31               | 145.09±23.38           | 0.66    |
| Serum FBG, mmol/L      | 5.7±1.3                    | 5.9±1.5                | 0.19    |
| Serum TG, mmol/L       | 1.5±0.2                    | 1.6±0.3                | 0.54    |
| Serum TC, mmol/L       | 4.7±0.6                    | 4.8±0.7                | 0.53    |
| PSA (ng/ml mean ± SD)  | 1.2±0.34                   | 9.8±5.6                | 0.0019  |

Note: BMI, body mass index; DBP, diastolic blood pressure; FBG, fasting (2 hours postprandial) blood glucose; SBP, systolic blood pressure; TC, total cholesterol; TG, triglycerides; PSA, serum prostate-specific antigen. Parameter values of patients and healthy control were compared using t-test. The p values less than 0.05 were considered significant.

**Table S2.** ROC curve analysis of potential biomarkers in PCa.

| No | Metabolite             | AUC   | Sensitivity (%) | Specificity (%) |
|----|------------------------|-------|-----------------|-----------------|
| 1  | Glycocholic acid       | 0.973 | 97.2            | 96.3            |
| 2  | Hippurate              | 0.967 | 94.1            | 92.0            |
| 3  | 5-Hydroxy-L-tryptophan | 0.958 | 88.7            | 78.2            |
| 4  | Taurocholic acid       | 0.826 | 85.4            | 83.9            |
| 5  | Chenodeoxycholic acid  | 0.871 | 78.8            | 69.7            |
